# Supplementary material for: RNA chaperone assisted intramolecular annealing reaction towards oligouridylated RNA detection in cancer cells
Source: Royal Society of Chemistry journal article supplement (doi:10.1039/c8an01662c), 2018-10-22
Supplement: c8an01662c1.pdf [file c8an01662c1.pdf]

# **RNA Chaperone Assisted Intramolecular Annealing Reaction Towards: Oligouridylated RNA Detection in Cancer Cells**

Kai Zhang,<sup>a, b</sup> Xue-Jiao Yang,<sup>a</sup> Ting-Ting Zhang,<sup>a</sup> Xiang-Ling Li,<sup>\*, a</sup> Hong-Yuan  
Chen,<sup>a</sup> and Jing-Juan Xu<sup>\*, a</sup>

*<sup>a</sup> State Key Laboratory of Analytical Chemistry for Life Science and Collaborative  
Innovation Center of Chemistry for Life Sciences, School of Chemistry and Chemical  
Engineering, Nanjing University, Nanjing 210023, China. E-mail: xlli@nju.edu.cn (X.-  
L. Li); xujj@nju.edu.cn (J.-J. Xu).*

*<sup>b</sup> Key Laboratory of Nuclear Medicine, Ministry of Health, Jiangsu Key Laboratory of  
Molecular Nuclear Medicine, Jiangsu Institute of Nuclear Medicine, Wuxi, Jiangsu  
214063, China.*

## Experimental Section

**Reagents.** Chloroauric acid (HAuCl<sub>4</sub>•4H<sub>2</sub>O) was obtained from Shanghai Chemical Reagent Company (Shanghai, China). Tris (2-carboxyethyl) phosphine hydrochloride (TCEP) and Diethyl pyrocarbonate (DEPC) were purchased from Sigma-Aldrich Inc. (St. Louis, Missouri, USA). The strand sequences were obtained from Genscript Biotech. Co., Ltd. (Nanjing, China) with the sequences as shown in Table S1. Fluorescence intensity was measured by RF-5301PC Spectrofluorophotometer (Shimadzu, Japan). All the samples in our strategy were excited at 548 nm and emitted at 562 nm. DEPC-treated deionized water was used in all experiments.

**Table S1.** Sequences of oligo used in this strategy. The italic type base pairs in RNA1 and RNA2 are the hybridization part. The bold bases in cDNA are BmtI cutting sites (**GCTAGC**) and HindIII cutting sites (**AAGCTT**). The underline bases of RNA1 are the hybridization part which target OUP let-7.

| note                        | sequence (5'-3')                                                                                                              |
|-----------------------------|-------------------------------------------------------------------------------------------------------------------------------|
| RNA1                        | <u>AAAAAAUCCAAGGAAAGACACCGAAAAAA</u> -SH                                                                                      |
| Q-RNA1                      | <u>AAAAAAUCCAAGGAAAGACACCGAAAAAA</u> -BHQ2                                                                                    |
| RNA2                        | 5'-Cy3- <u>UCGGUGUCUUUCCU</u> -3'                                                                                             |
| cDNA*                       | <b>GCTAGC</b> <u>AAAAAATCCAAGGAAAGACAGTAGATTGTATAGTTAT</u><br>CTCCAGTGGTGGGTGTGACCCTAAACTATAACAACCTACTACC<br><b>TCAAAGCTT</b> |
| OUP let-7                   | UGAGGUAGUAGGUUGUAUAGUUUUAGGGUCACACCCACCACU<br>GGGAGUAACUAUACAAUCUACUGUCUUUCCUUGGAUUUUUU                                       |
| Oligos for selectivity test |                                                                                                                               |
| Let-7a                      | UGAGGUAGUAGGUUGUAUAGUU                                                                                                        |
| Let-7b                      | UGAGGUAGUAGGUUGUGUGGUU                                                                                                        |
| Let-7c                      | UGAGGUAGUAGGUUGUAUGGUU                                                                                                        |
| miR 21                      | UAGCUUAUCAGACUGAUGUUGA                                                                                                        |

\*cDNAs are dsDNA. Other sequences are RNA.

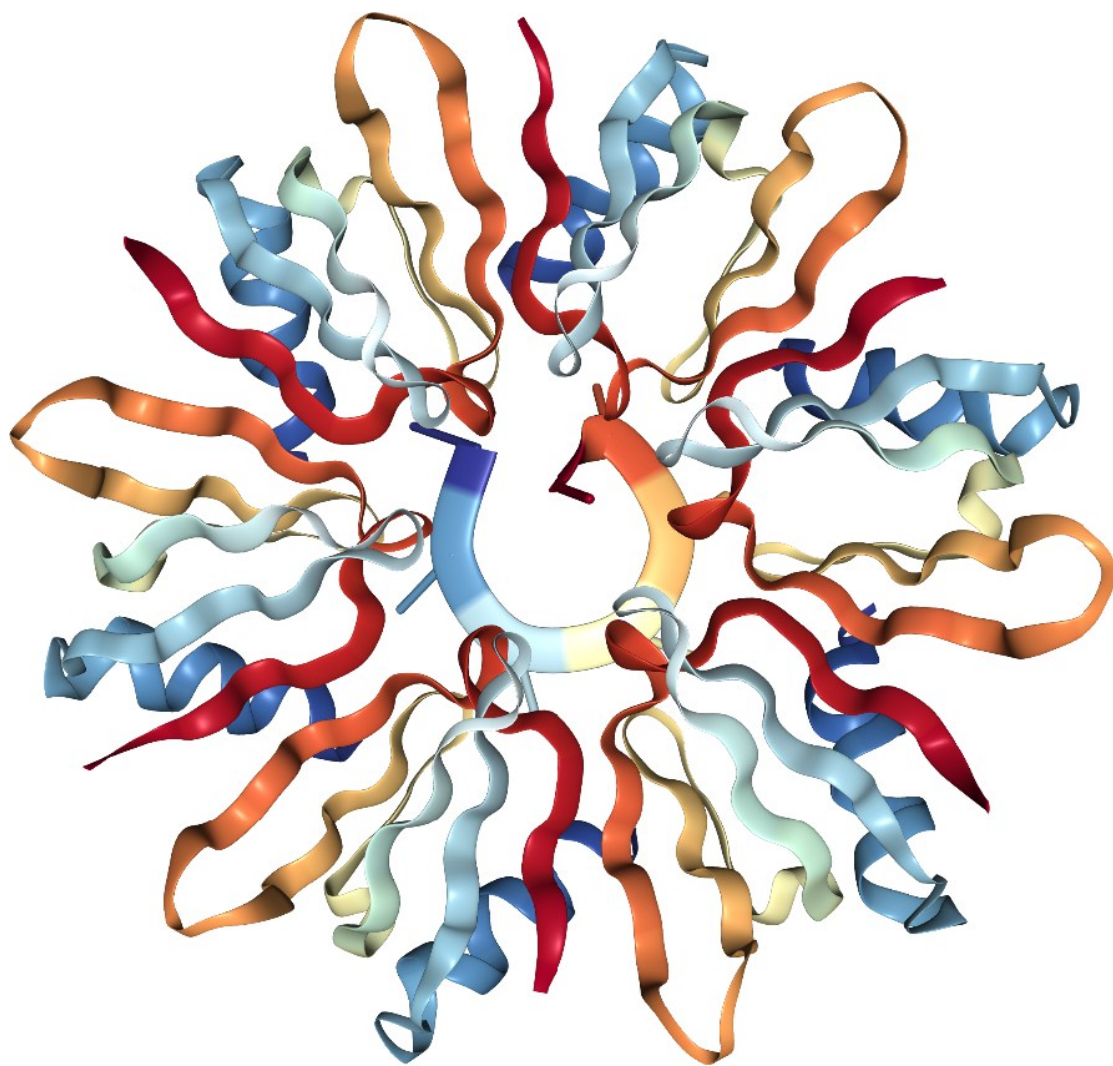

**Fig. S1.** The crystal structure of an Hfq/RNA complex. PDB number: 1KQ2.

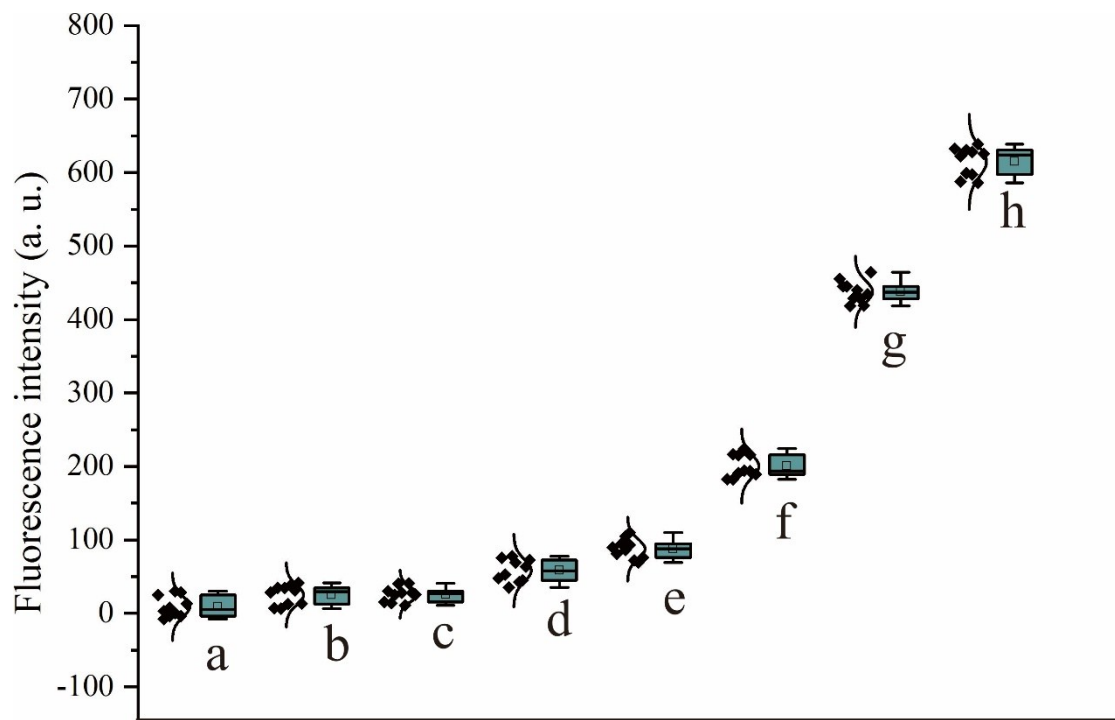

**Fig. S2.** Box plots reflecting the data distribution of ten independent trials for different concentrations of OUP let-7, a: 0, b: 10 nM, c: 20 nM, d: 50 nM, e: 100 nM, f: 200 nM, g: 500 nM, h: 800 nM.

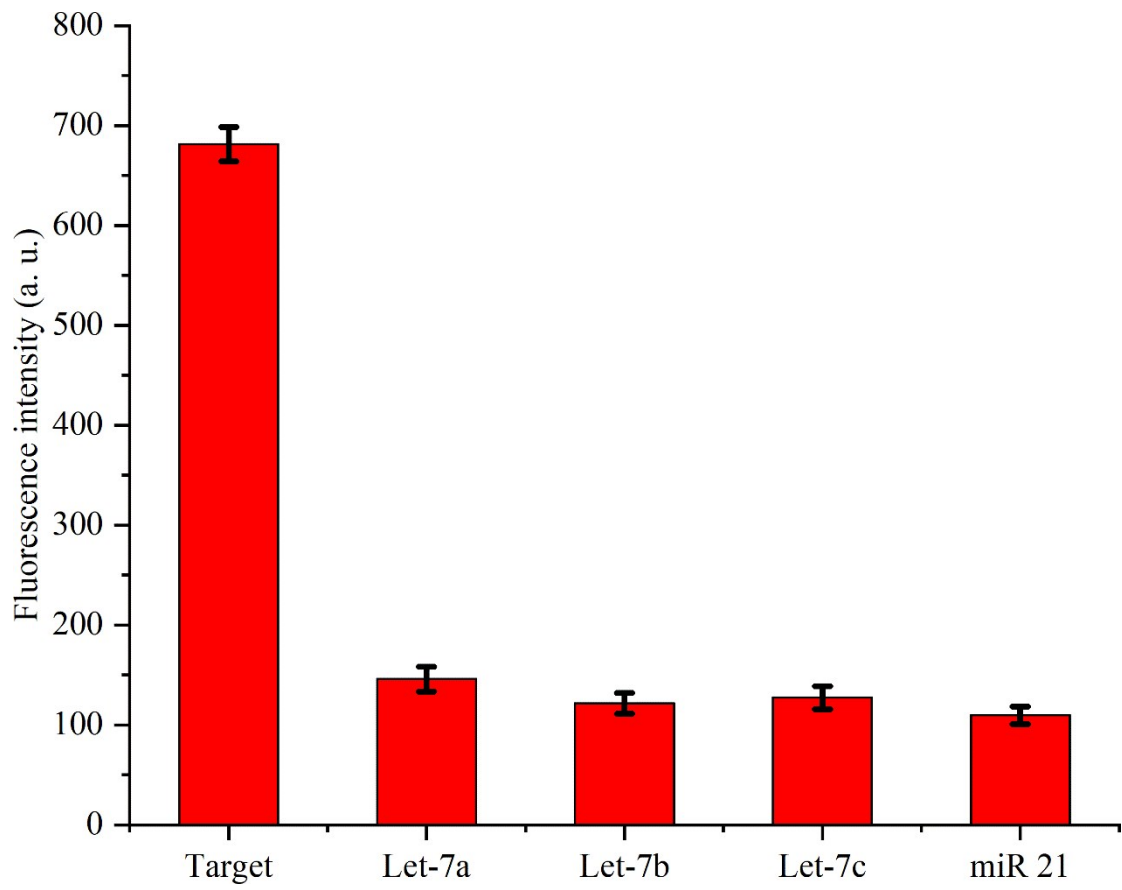

**Fig. S3.** The fluorescence intensity of target OUP RNA or other RNAs (1  $\mu$ M each) reacted with probes.

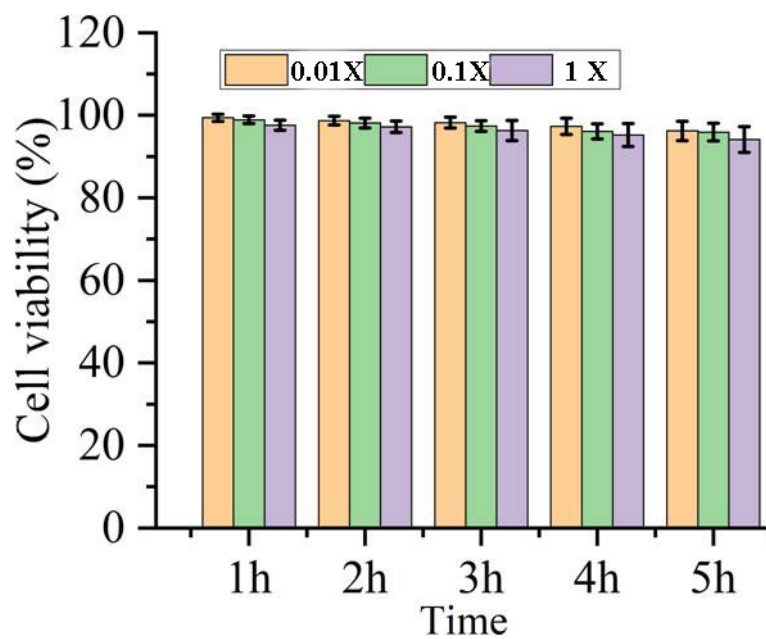

**Fig. S4.** Cell Viability of HeLa cells treated with the probes (1X), probes diluted 10 times (0.1 X) and probes diluted 100 times (0.01 X).

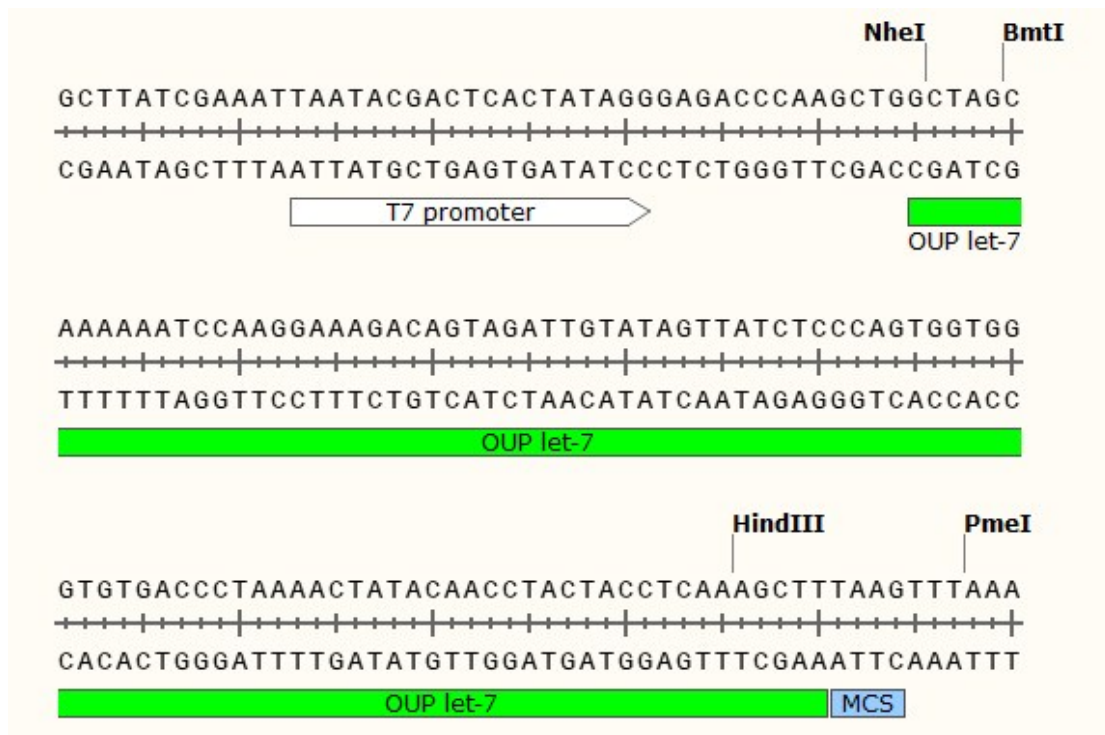

Fig. S5. The sequences of OUP let-7 cDNA (marked with green) and the site that cDNA cloned into pcDNA 3.1(-).
